# Supplementary material for: Depressive and anxiety disorders worsen the prognosis of glioblastoma
Source: publisher site journal article supplement (doi:10.18632/aging.103593), 2020-10-02
Supplement: Supplementary file [file aging-v12i20-103593-supplementary-material-SD2.pdf]

## SUPPLEMENTARY TABLES

**Supplementary Table 1. Basic information of enrolled patients and control group.**

|                   | <b>GBM</b>        | <b>CONTROL</b>    | <b>P value</b> |
|-------------------|-------------------|-------------------|----------------|
| <b>Total</b>      | 84                | 45                | -              |
| <b>Male (%)</b>   | 40                | 24                | 0.582          |
| <b>Female (%)</b> | 44                | 21                | 0.582          |
| <b>Age</b>        | 45.04±0.88(years) | 46.02±1.71(years) | 0.580          |

There was no significant difference between the two groups in terms of gender (Pearson Chi-square test,  $P = 0.582$ ) and age (Student t test,  $P = 0.580$ ). GBM: Glioblastoma Multiforme.

**Supplementary Table 2. Definition of MRI patterns.**

| <b>Imaging features</b>      | <b>Classification criterion</b>                                                                                                                                                              |
|------------------------------|----------------------------------------------------------------------------------------------------------------------------------------------------------------------------------------------|
| <b>Edema extent</b>          |                                                                                                                                                                                              |
| <b>Minor</b>                 | Peritumoral edema extending <1 cm from tumor margin                                                                                                                                          |
| <b>Major</b>                 | Peritumoral edema extending ≥1 cm from tumor margin                                                                                                                                          |
| <b>Edema shape</b>           |                                                                                                                                                                                              |
| <b>Regular</b>               | The shape of edema is similar to round and is not radial                                                                                                                                     |
| <b>Irregular</b>             | The shape of edema tends to irregular, such as finger-like or radial shape                                                                                                                   |
| <b>Necrosis</b>              |                                                                                                                                                                                              |
| <b>No</b>                    | No necrosis within tumor                                                                                                                                                                     |
| <b>Yes</b>                   | A region had high signal on T2-W images, but low signal on T1-W images, and had an irregular enhancing border on contrast-enhanced images                                                    |
| <b>Cyst</b>                  |                                                                                                                                                                                              |
| <b>No</b>                    | No cyst in tumor                                                                                                                                                                             |
| <b>Yes</b>                   | A rounded region which was very low T1-W signal and very high T2-W signal matching cerebrospinal fluid signal, and had a thin, smooth, regular, and slightly enhancing or non-enhancing wall |
| <b>Enhancement</b>           |                                                                                                                                                                                              |
| <b>No obvious</b>            | Enhancement signal is less than the signal of fat                                                                                                                                            |
| <b>Obvious</b>               | Enhancement signal is similar to that of fat                                                                                                                                                 |
| <b>Tumor crosses midline</b> |                                                                                                                                                                                              |
| <b>No</b>                    | Tumor is limited to unilateral cerebral hemisphere                                                                                                                                           |
| <b>Yes</b>                   | Tumor crosses the brain midline and extends into the other side of cerebral hemisphere                                                                                                       |
| <b>Edema crosses midline</b> |                                                                                                                                                                                              |
| <b>No</b>                    | Peritumoral edema extent is limited to unilateral cerebral hemisphere                                                                                                                        |
| <b>Yes</b>                   | Peritumoral edema extent crosses the brain midline and is not confined to unilateral cerebral hemisphere                                                                                     |
| <b>Size (cm)</b>             |                                                                                                                                                                                              |
| <b>&lt; median</b>           | The maximum diameter of tumor is less than 4.8 cm                                                                                                                                            |
| <b>≥ median</b>              | The maximum diameter of tumor is equal to or more than 4.8 cm                                                                                                                                |
